# Supplementary material
Source: PubMed Central journal article supplement (PMC2648141)
Supplement: NIHMS73489-supplement-supplement_1.pdf [file NIHMS73489-supplement-supplement_1.pdf]

Type of file: figure

Label: 5

Filename: figure\_5.jpg

# Supplementary Figure S1

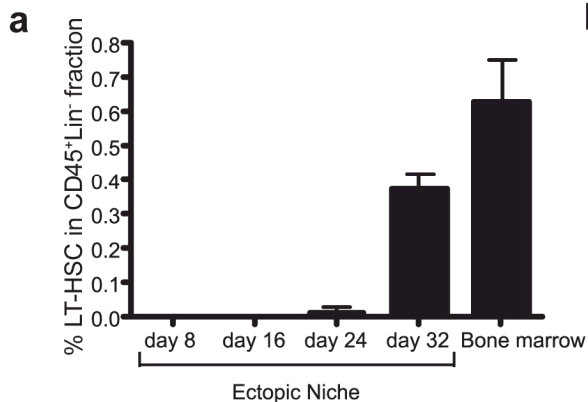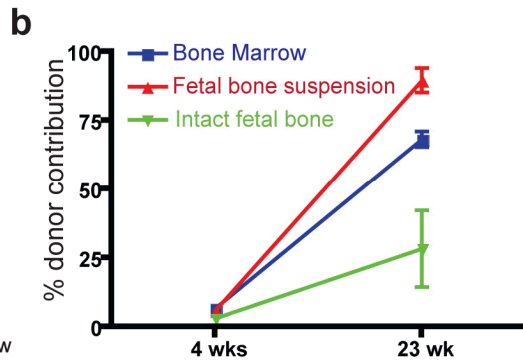

**c**

|          | CD105+Thy-1- |        | CD105+Thy-1+ |        | CD105-Thy-1- |         |
|----------|--------------|--------|--------------|--------|--------------|---------|
|          | Bone         | Marrow | Bone         | Marrow | Bone         | Marrow  |
| 13.5 dpc | 21/21        | 21/21  | 7/8          | 4/8*   | 9/9          | 2/9***  |
| 14.5 dpc | 12/12        | 12/12  | 14/15        | 4/15** | 14/18        | 4/18*** |
| 15.5 dpc | 13/13        | 11/13  | 5/5          | 0/5*   | 9/9          | 2/9*    |
| 18.5 dpc | 7/7          | 7/7    | 3/3          | 0/3*   | 7/7          | 0/7**   |
| total    | 51/53        |        | 8/31***      |        | 8/43***      |         |

\*P<0.01, \*\*P<0.001, \*\*\*P<0.0001

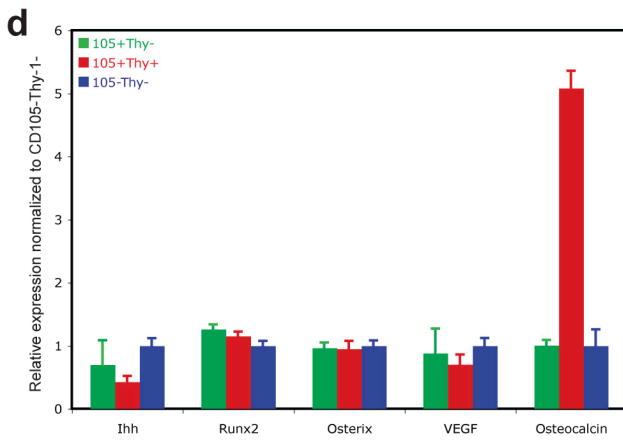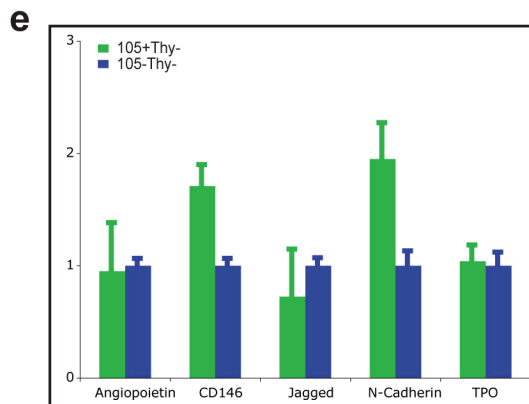

Type of file: figure

Label: 6

Filename: figure\_6.jpg

# Supplementary Figure S2

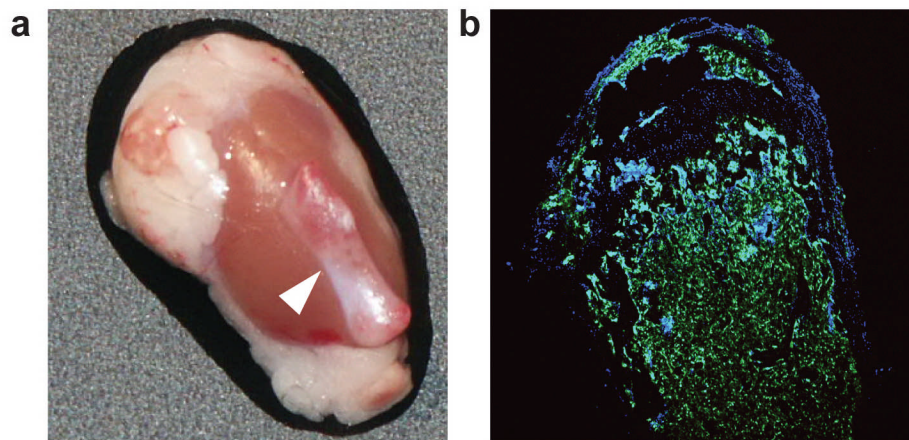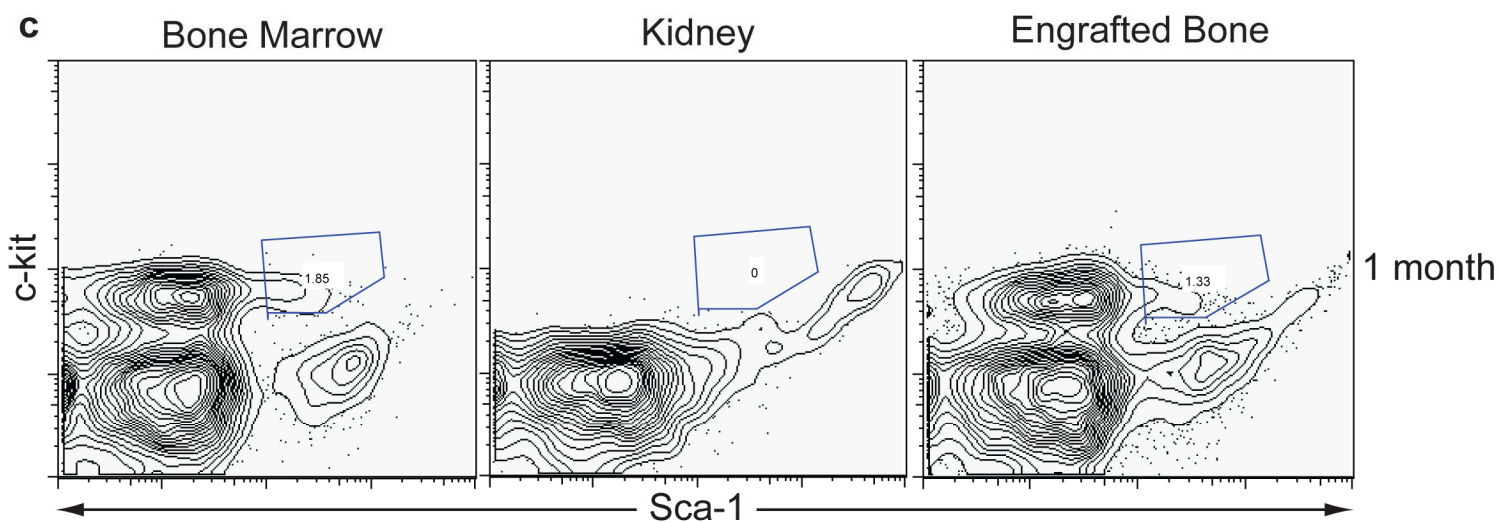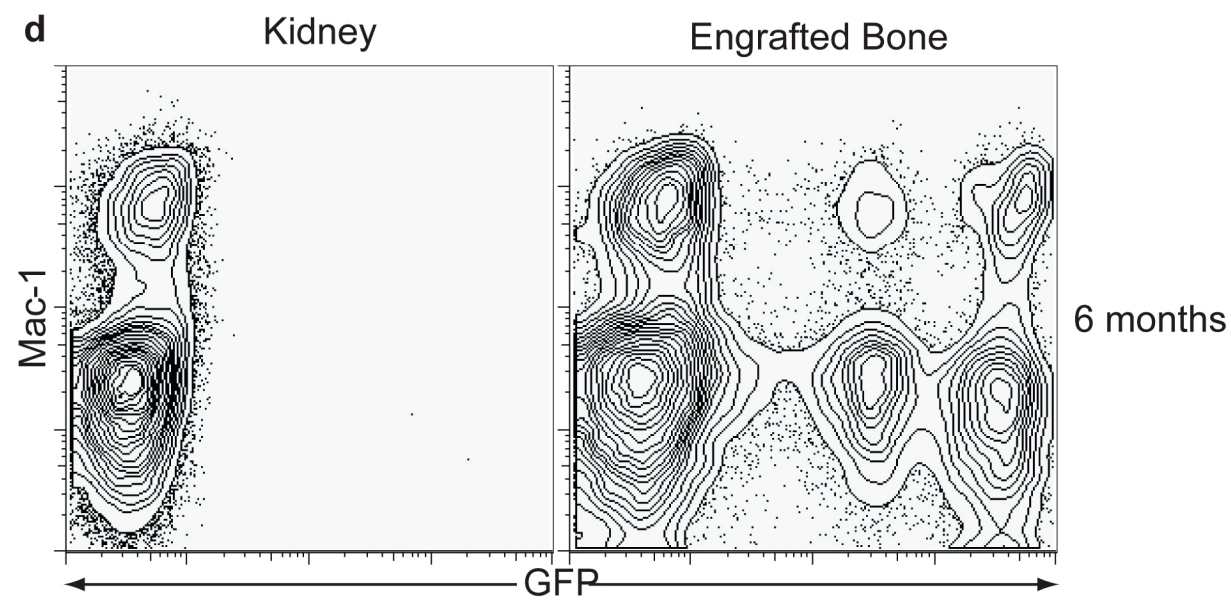

Type of file: figure

Label: 7

Filename: figure\_7.jpg

GFP(-)CD105(+)Thy1(-)Skeletal Progenitors → GFP (+) Renal Capsule → 1month

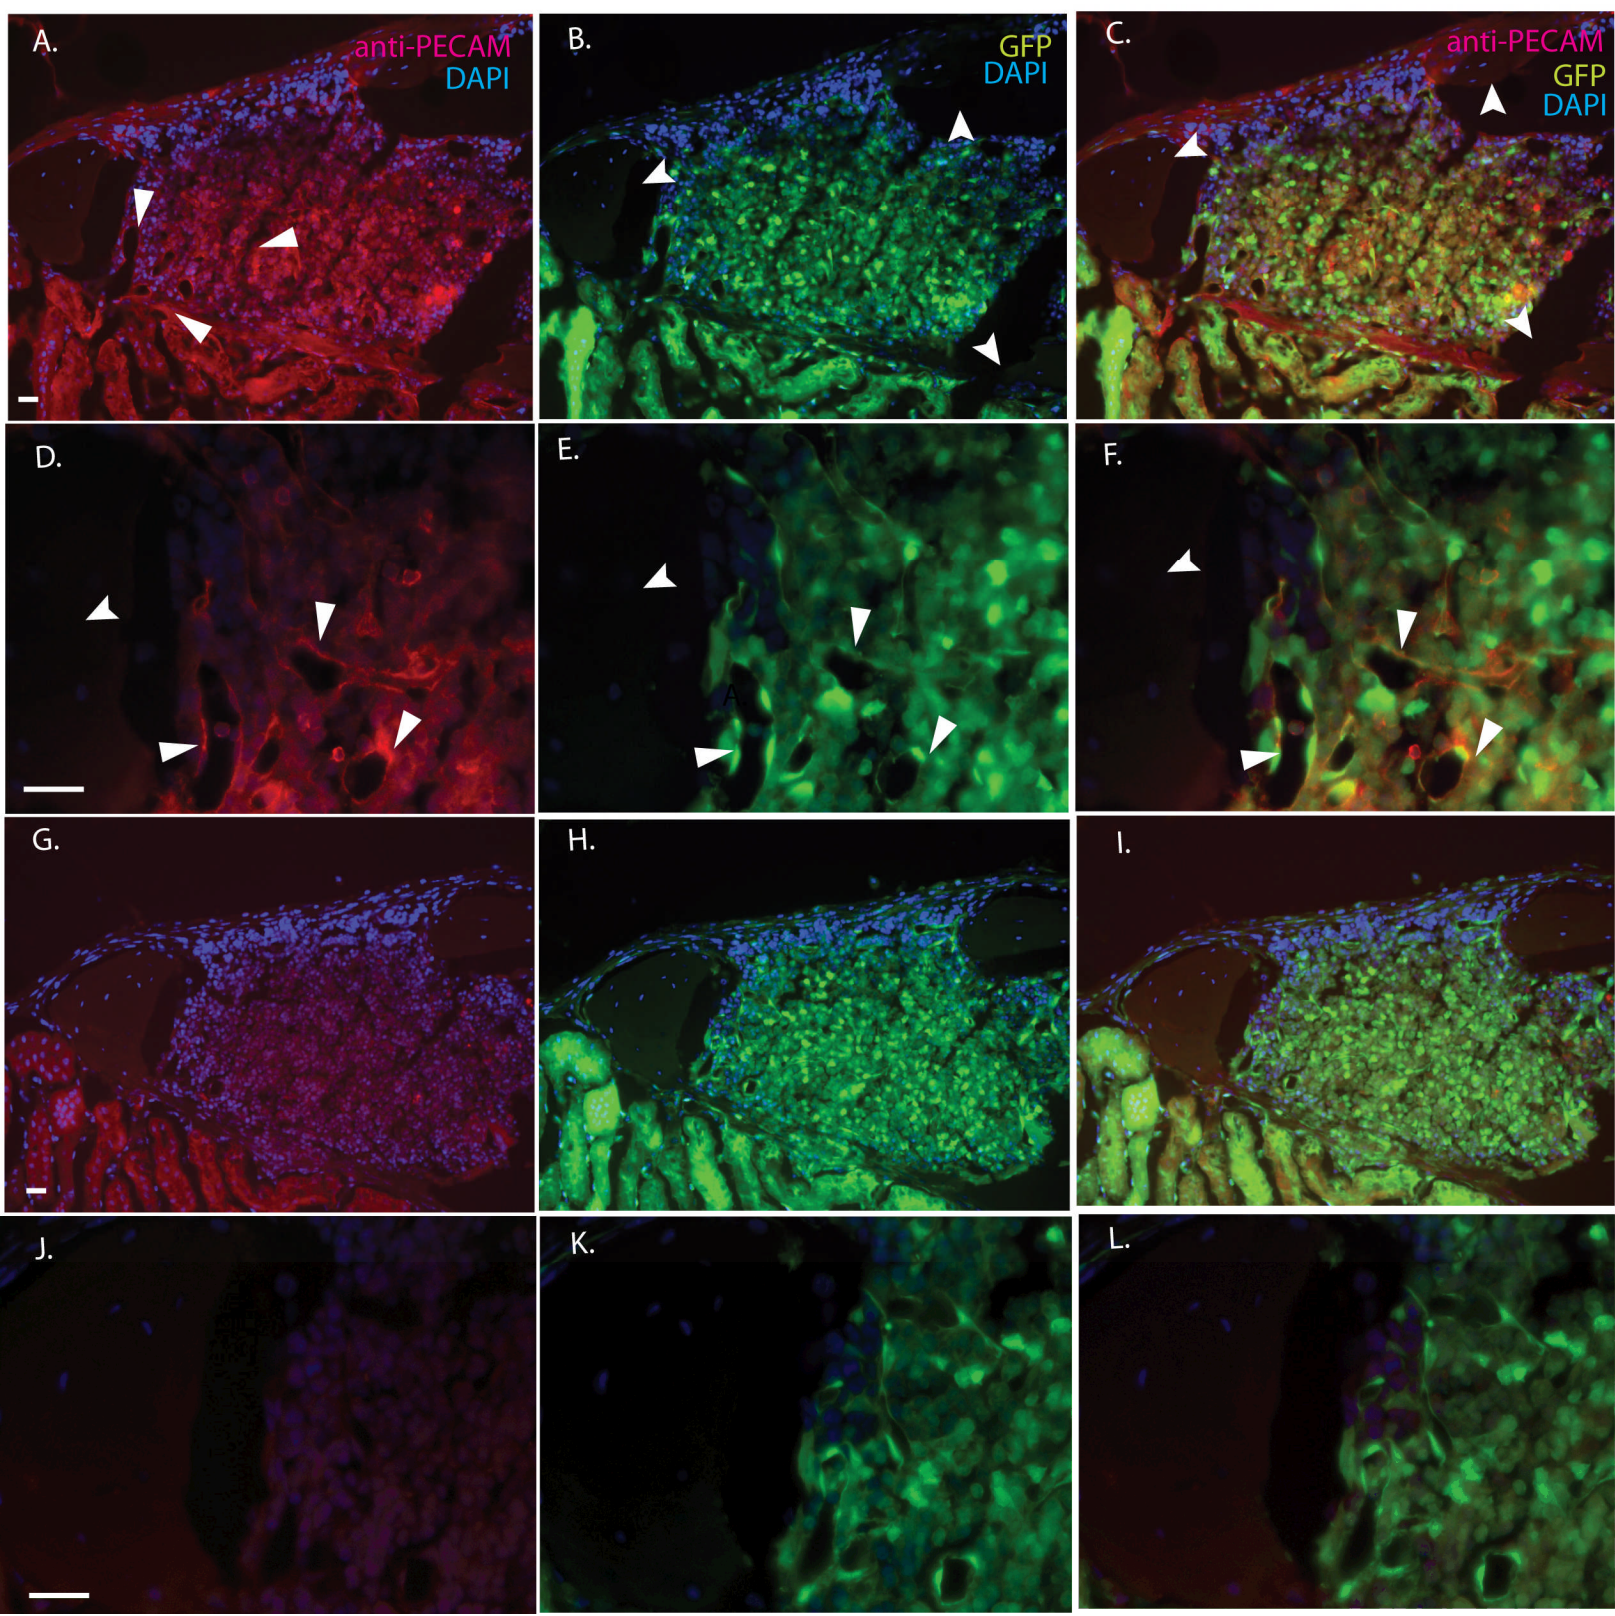

Type of file: figure

Label: 8

Filename: figure\_8.jpg

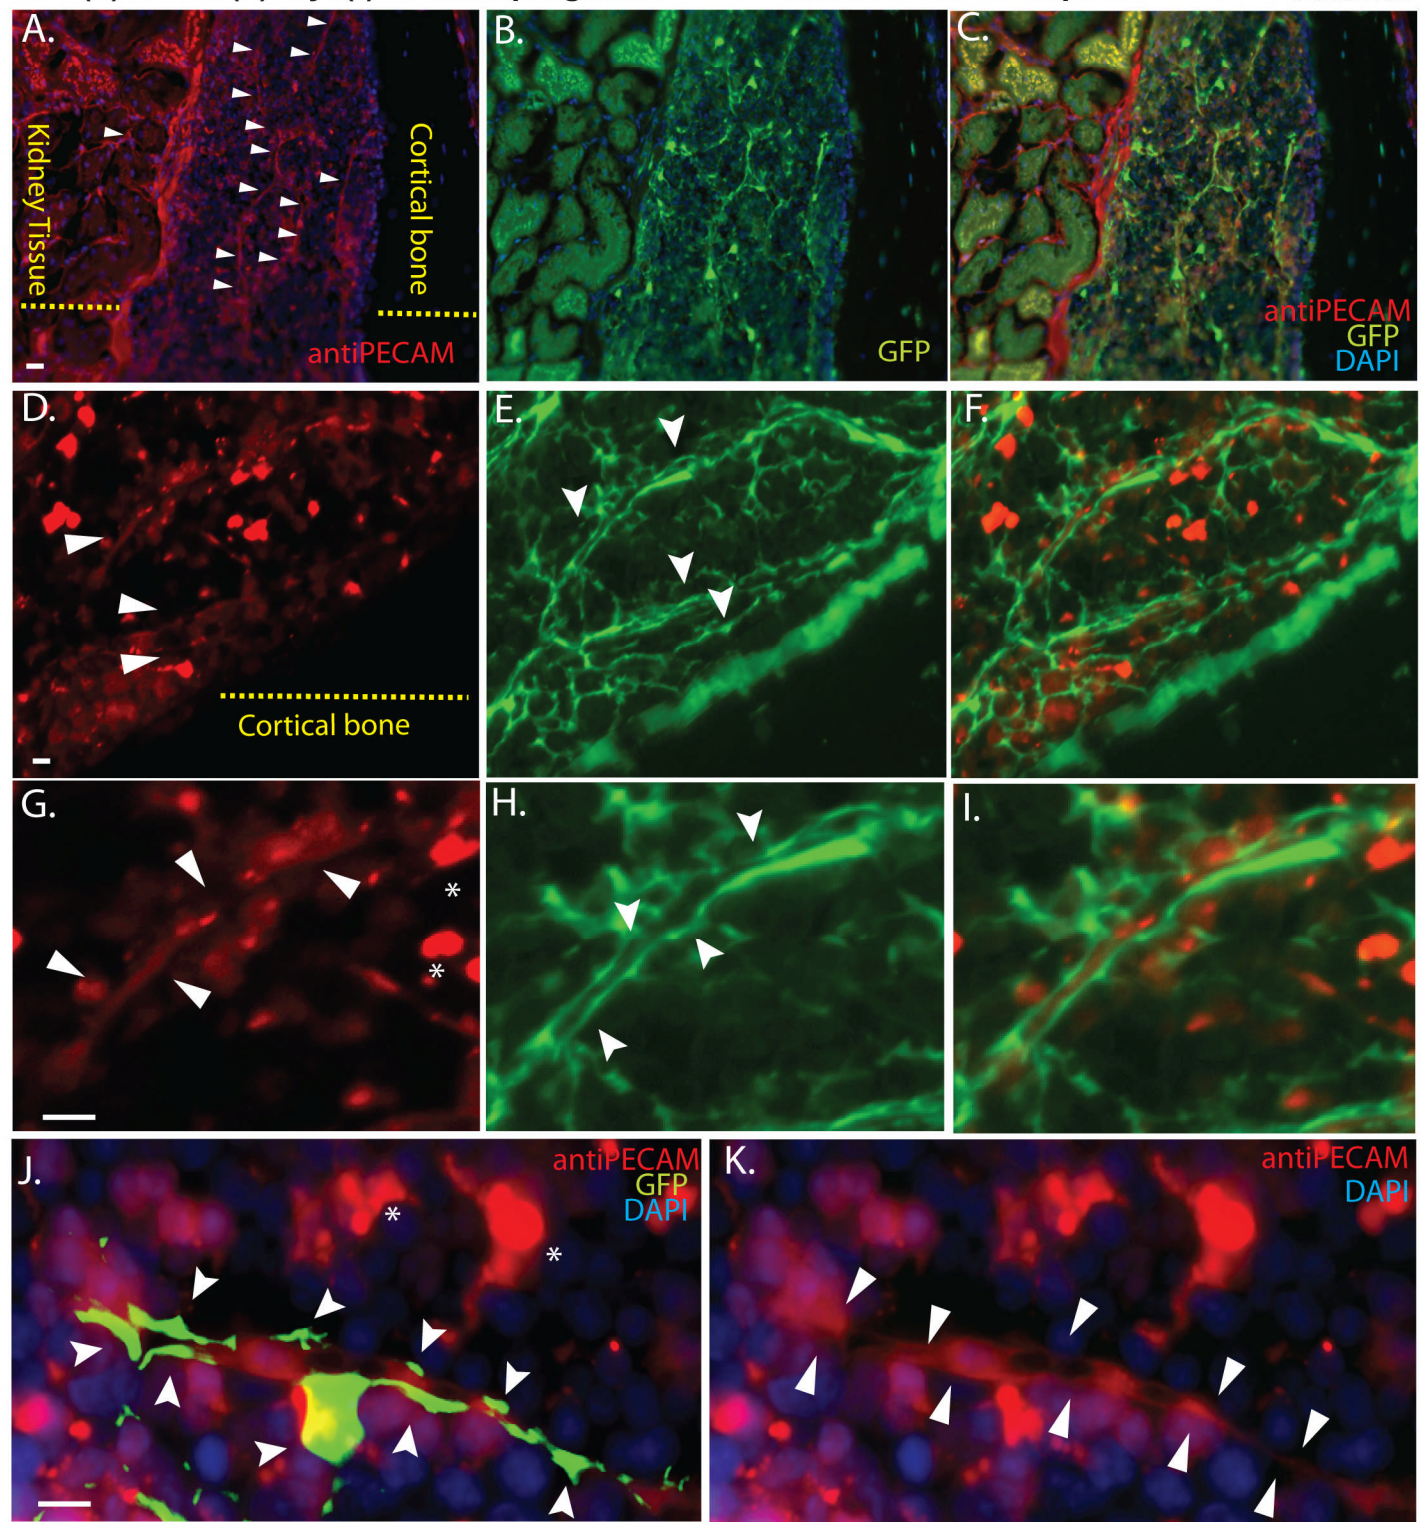



Type of file: figure

Label: 9

Filename: figure\_9.jpg

Supplementary Figure S5

12 week CD45.2 Donor Contribution in Peripheral Blood: 1e6 Kidney Marrow Rescue

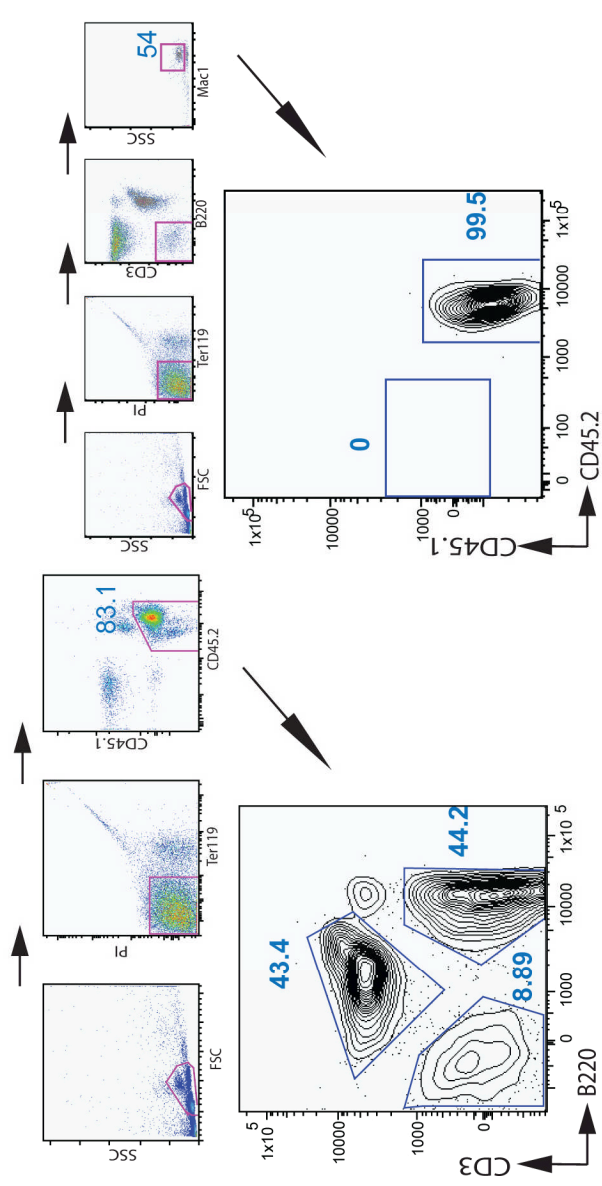

12 week CD45.2 Donor Contribution in Peripheral Blood: 1e6 Limb Marrow Rescue

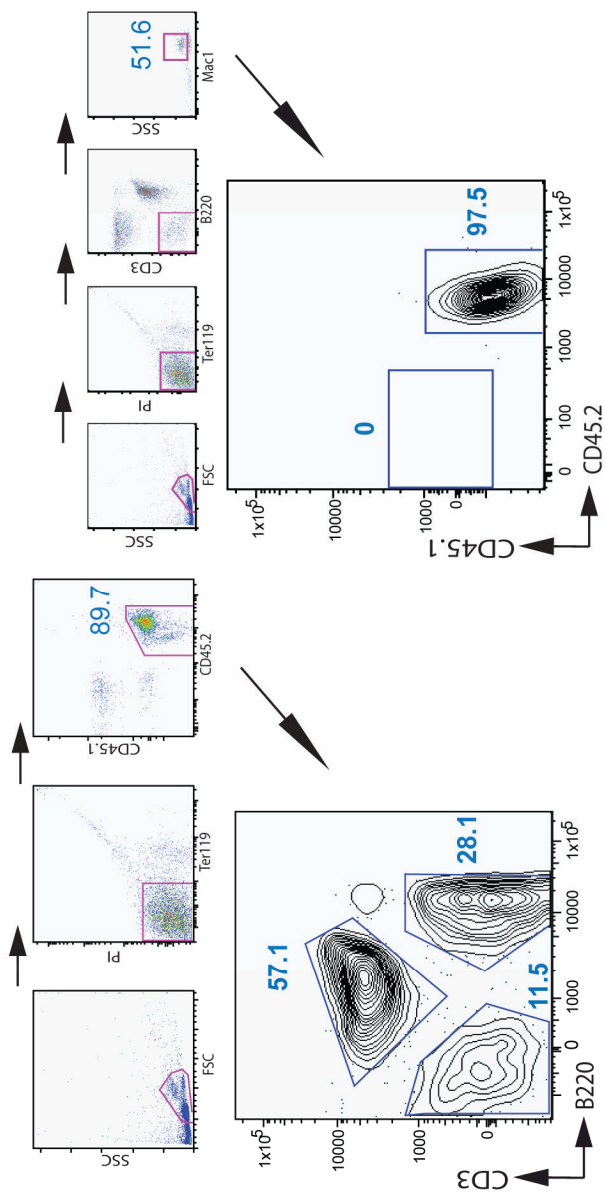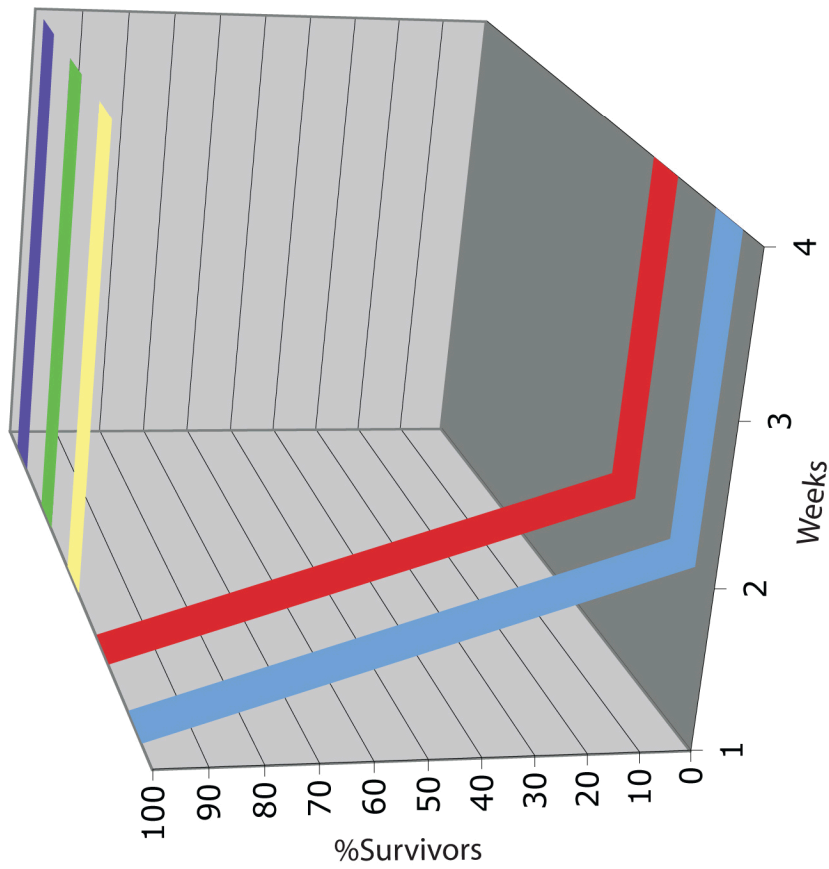

- PBS
- 1e6 Kidney Cells
- 1e6 Limb marrow
- 1e6 Kidney marrow
- 3e6 Kidney marrow
